# Supplementary material for: Synthetic gene circuits for preventing disruption of the circadian clock due to interleukin-1–induced inflammation
Source: PubMed Central journal article supplement — Sci Adv. 2022 May 25;8(21):eabj8892. doi: 10.1126/sciadv.abj8892 (PMC9132444; doi:10.1126/sciadv.abj8892), 2022-05-25
Supplement: sciadv.abj8892_sm.pdf [file sciadv.abj8892_sm.pdf]

Supplementary Materials for  
**Synthetic gene circuits for preventing disruption of the circadian clock due to interleukin-1–induced inflammation**

Lara Pferdehirt *et al.*

Corresponding author. Email: [guilak@wustl.edu](mailto:guilak@wustl.edu)

*Sci. Adv.* **8**, eabj8892 (2022)  
DOI: [10.1126/sciadv.abj8892](https://doi.org/10.1126/sciadv.abj8892)

**This PDF file includes:**

Figs. S1 and S2

## Supplemental Figure 1.

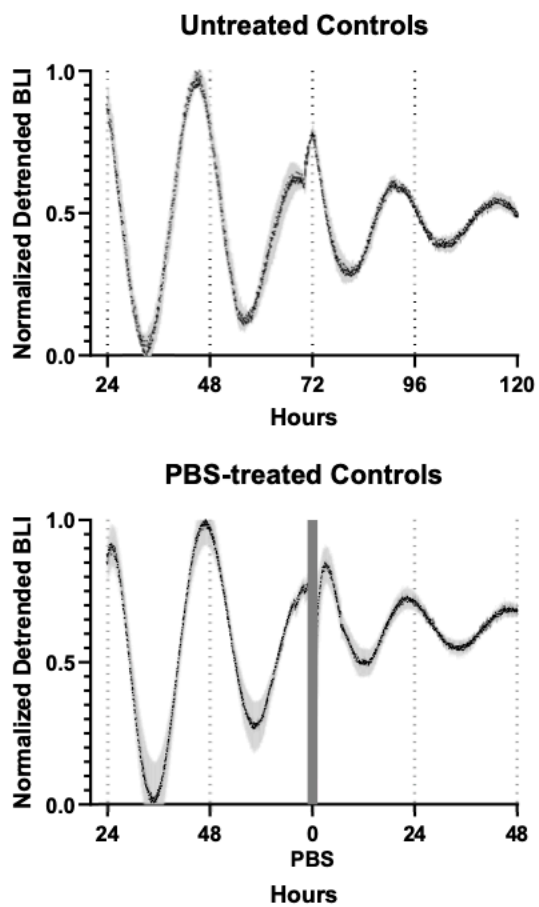

**Supplemental Figure 1.** PBS-treated control pellets exhibit a daily decrease in amplitude nearly identical to unperturbed pellets over 120h of recording.

## Supplemental Figure 2.

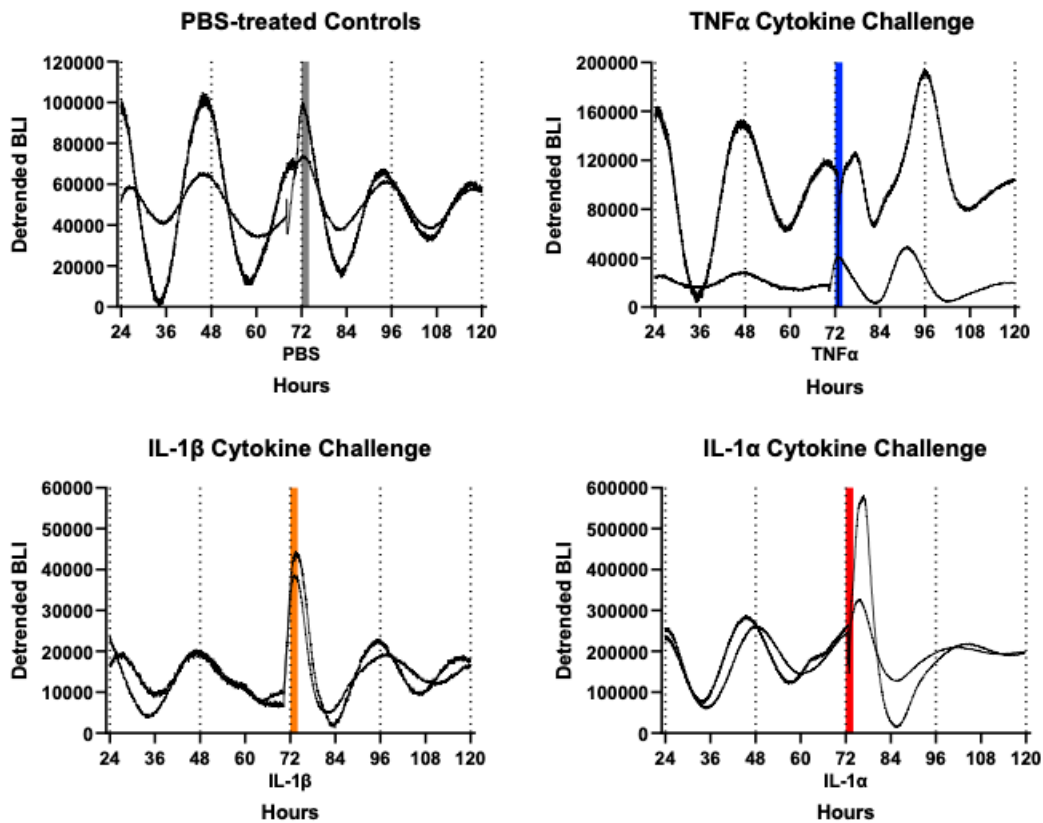

**Supplemental Figure 2.** Per2 expression recorded from two representative cultures of chondrocyte pellets for 3 days before and after treatment. Pellets treated with IL-1 $\alpha$ , but not vehicle, TNF $\alpha$ , or IL-1 $\beta$ , showed dramatic loss of circadian gene expression. We present the average traces normalized to the maximum bioluminescence of each culture in Figures 3 and 4 and report amplitude and period from measurements of the raw traces.
